# Supplementary figures and images for: Electromagnetic interference (EMI) shielding performance of lightweight metal decorated carbon nanostructures dispersed in flexible polyvinylidene fluoride films
Source: Royal Society of Chemistry journal article supplement (doi:10.1039/c8nj02460j), 2018-01-01

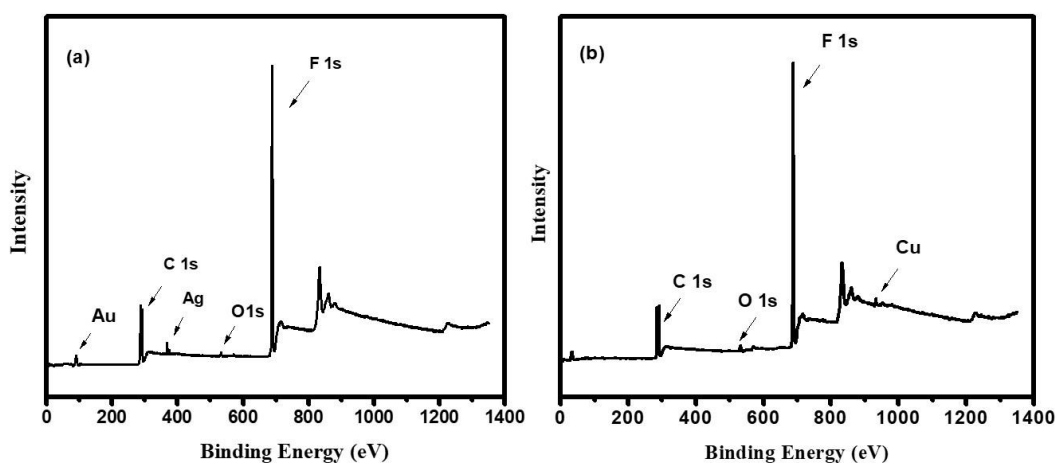

S1. XPS survey spectra for metals-rGO-MWCNT/PVDF composites

Supplement: c8nj02460j1.pdf [file c8nj02460j1.pdf]
